# Supplementary material for: The Impact of Urbanization and Human Mobility on Seasonal Influenza in Northern China
Source: MDPI journal article supplement (doi:10.3390/v14112563), 2022-11-19
Supplement: s1 [file s1]

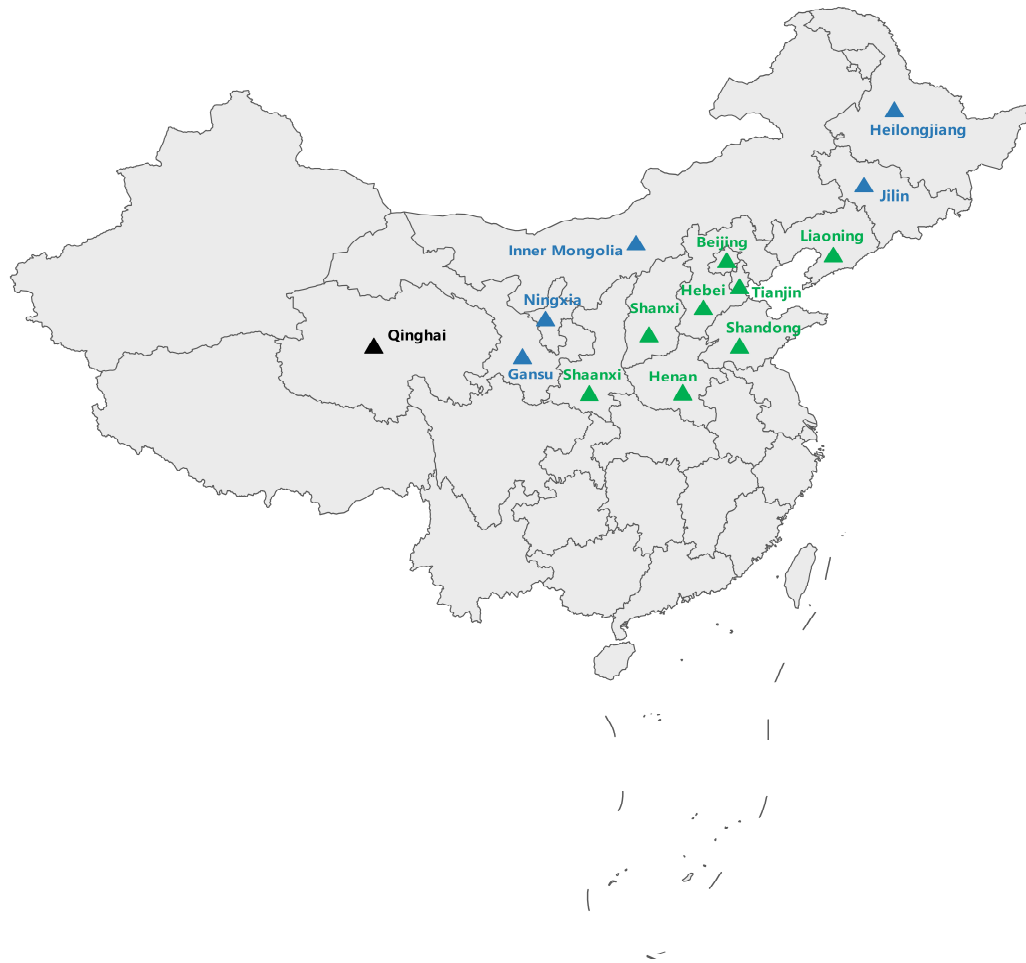

**Figure S1.** The map indicating the provinces studied in northern China. The color indicates the climatic domain: cold- temperate (black); mid-temperate (blue); warm-temperate (green).

**Table S1.** Summary statistics on the means of fitted model parameters across provinces.

| Parameter  | Meaning                 | 25th percentile | Median | Mean | 75th percentile |
|------------|-------------------------|-----------------|--------|------|-----------------|
| $\sigma_1$ | Transmission gain 12/13 | 2.73            | 3.05   | 3.00 | 3.26            |
| $\sigma_2$ | Transmission gain 13/14 | 2.78            | 2.95   | 3.09 | 3.12            |
| $\sigma_3$ | Transmission gain 14/15 | 2.78            | 2.95   | 3.05 | 3.12            |
| $\sigma_4$ | Transmission gain 15/16 | 2.69            | 2.99   | 3.11 | 3.25            |
| $\sigma_5$ | Transmission gain 16/17 | 2.60            | 2.77   | 2.78 | 2.92            |
| $\sigma_6$ | Transmission gain 17    | 2.72            | 3.04   | 3.12 | 3.31            |
| $\rho_1$   | Off-peak reporting (%)  | 0.00            | 0.00   | 0.00 | 0.00            |
| $\rho_2$   | Peak reporting (%)      | 1.56            | 2.42   | 2.78 | 3.94            |
| $\omega_1$ | Off-peak loss rate      | 0.42            | 0.50   | 0.61 | 0.86            |
| $\omega_2$ | Peak loss rate          | 0.42            | 0.53   | 0.79 | 0.86            |

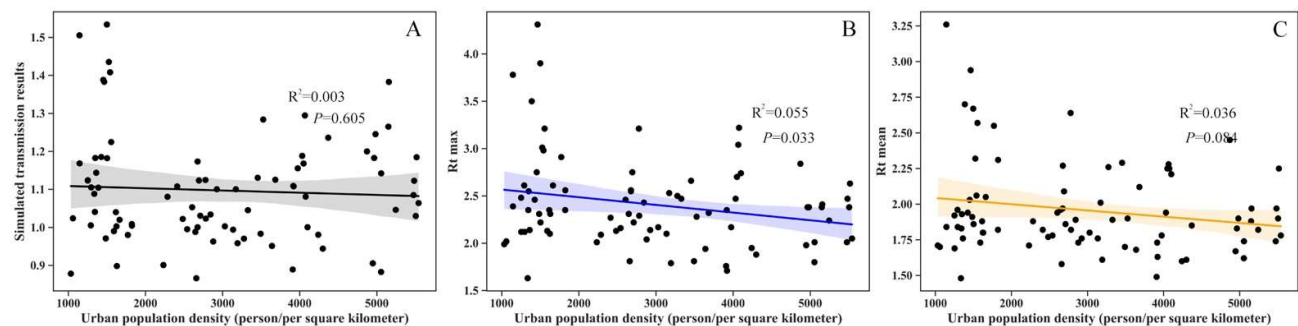

**Figure S2.** The association for urban population density with transmission potential (A), maximum  $R_t$  (B) and mean  $R_t$  (C) in peak time of influenza season.

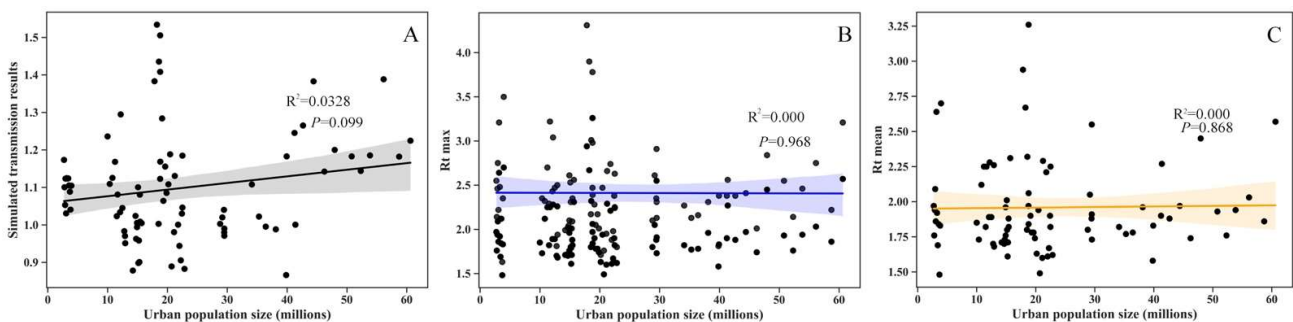

**Figure S3.** The association for urban population size with transmission potential (A), maximum  $R_t$  (B) and mean  $R_t$  (C) in peak time of influenza season.
